# Supplementary material for: From Research into Practice: Converting Epidemiological Data into Relevant Information for Planning of Regional Health Services for Refugees in Germany
Source: Int J Environ Res Public Health. 2022 Jun 30;19(13):8049. doi: 10.3390/ijerph19138049 (PMC9265908; doi:10.3390/ijerph19138049)
Supplement: Supplementary file 1 [file ijerph-19-08049-s001.zip › Supplement_S2.pdf]

## Supplementary File S2: Code System

| List of Codes                                       | Frequency |
|-----------------------------------------------------|-----------|
| Code system                                         | 716       |
| Context                                             | 0         |
| Description of organisation                         | 15        |
| Description of tasks                                | 27        |
| Healthcare planning                                 | 0         |
| Actors' tasks in healthcare planning                | 22        |
| Description of collaboration in healthcare planning | 29        |
| Responsibilities in healthcare planning             | 6         |
| Description of planning processes                   | 10        |
| Short-term planning                                 | 5         |
| Long-term planning                                  | 11        |
| Challenges in healthcare planning                   | 37        |
| Other                                               | 15        |
| Decision-making basis                               | 0         |
| What kind of decisions are made?                    | 4         |
| Long-term decisions                                 | 19        |
| Short-term decisions                                | 11        |
| Who decides?                                        | 16        |
| Information basis for decisions                     | 40        |

|                                            |    |
|--------------------------------------------|----|
| Desirable information                      | 23 |
| Other                                      | 9  |
| Data                                       | 0  |
| Communication and use of data              | 16 |
| Requirements for data processing           | 11 |
| Challenges in data preparation / retrieval | 39 |
| Political sensitivity of data              | 9  |
| Data literacy (meta-level)                 | 21 |
| Other                                      | 13 |
| Dashboard: technical details               | 0  |
| Comprehensibility of the dashboard         | 0  |
| Background information on the dashboard    | 24 |
| difficult-to-understand terms              | 11 |
| Transparency of data                       | 22 |
| Other                                      | 13 |
| Functionalities                            | 0  |
| available                                  | 22 |
| missing                                    | 25 |
| Structure of the dashboard                 | 40 |
| Colour scheme                              | 13 |
| Technical problems                         | 16 |
| Other                                      | 9  |

|                                                     |    |
|-----------------------------------------------------|----|
| Dashboard: content related issues                   | 0  |
| (Potential) target group (users)                    | 6  |
| Fields of use/purpose in everyday work              | 24 |
| Desirable additional databases                      | 0  |
| (Other) vulnerable groups                           | 2  |
| General population                                  | 6  |
| Specific pathologies                                | 6  |
| Children's data                                     | 1  |
| Other                                               | 22 |
| How and who should be informed about the dashboard? | 14 |
| Other                                               | 9  |
| Other                                               | 11 |
| Usability test                                      | 10 |
