# Supplementary material for: From Research into Practice: Converting Epidemiological Data into Relevant Information for Planning of Regional Health Services for Refugees in Germany
Source: Int J Environ Res Public Health. 2022 Jun 30;19(13):8049. doi: 10.3390/ijerph19138049 (PMC9265908; doi:10.3390/ijerph19138049)
Supplement: Supplementary file 1 [file ijerph-19-08049-s001.zip › Supplement_S3.pdf]

## Supplementary File S3: Dashboard guide

# Dashboard to estimate regional health burden of asylum seekers in Baden-Wuerttemberg (RESPOND-INTENT)

Maren Hintermeier, Stella Erdmann, Kayvan Bozorgmehr, Louise Biddle | Heidelberg University Hospital

### Instrument zur Einschätzung der regionalen Krankheitslast unter geflüchteten Menschen (RESPOND-INTENT)

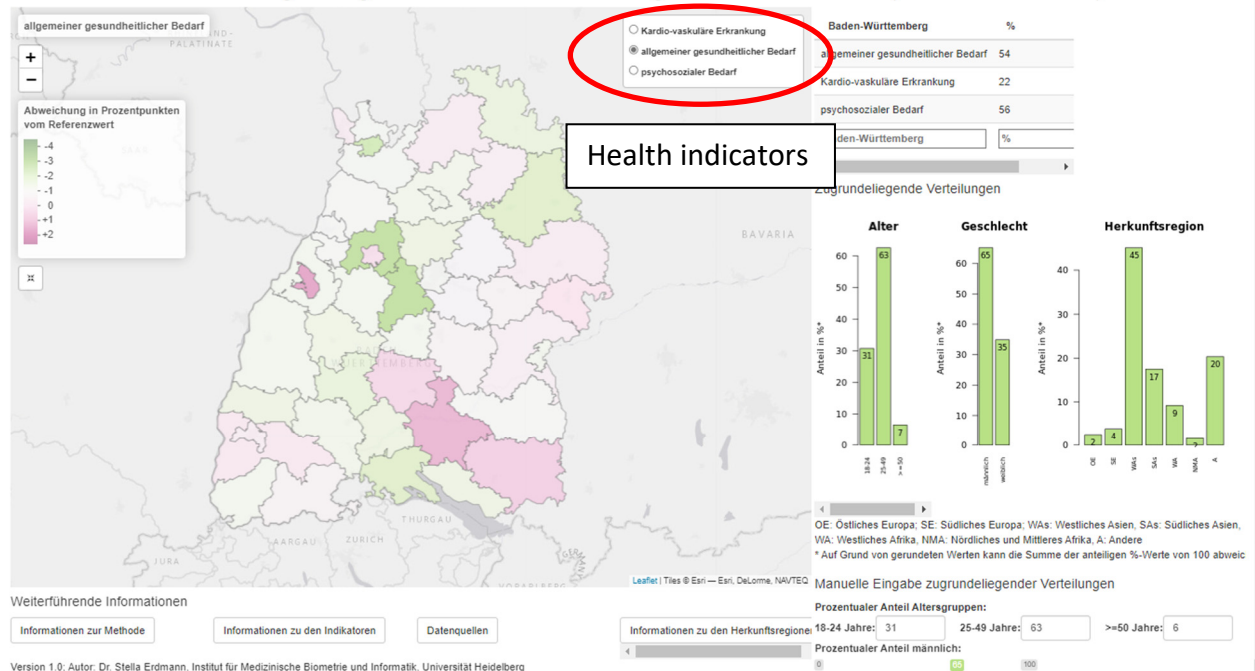

### Instrument zur Einschätzung der regionalen Krankheitslast unter geflüchteten Menschen (RESPOND-INTENT)

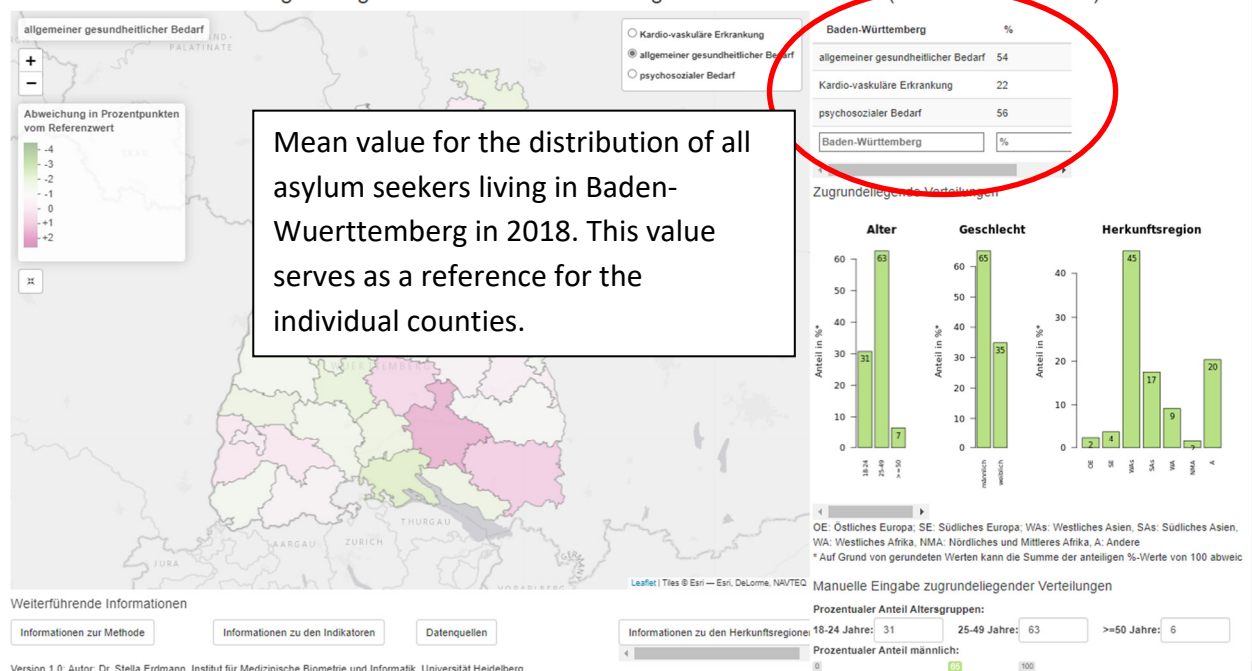

## Instrument zur Einschätzung der regionalen Krankheitslast unter geflüchteten Menschen (RESPOND-INTENT)

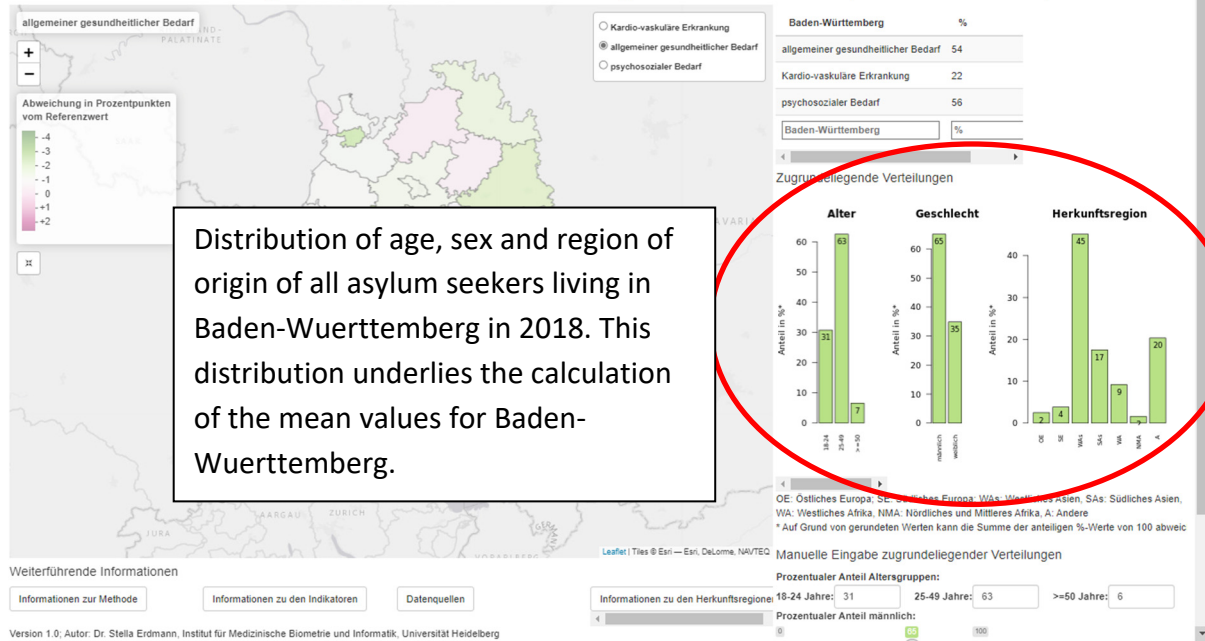

## Instrument zur Einschätzung der regionalen Krankheitslast unter geflüchteten Menschen (RESPOND-INTENT)

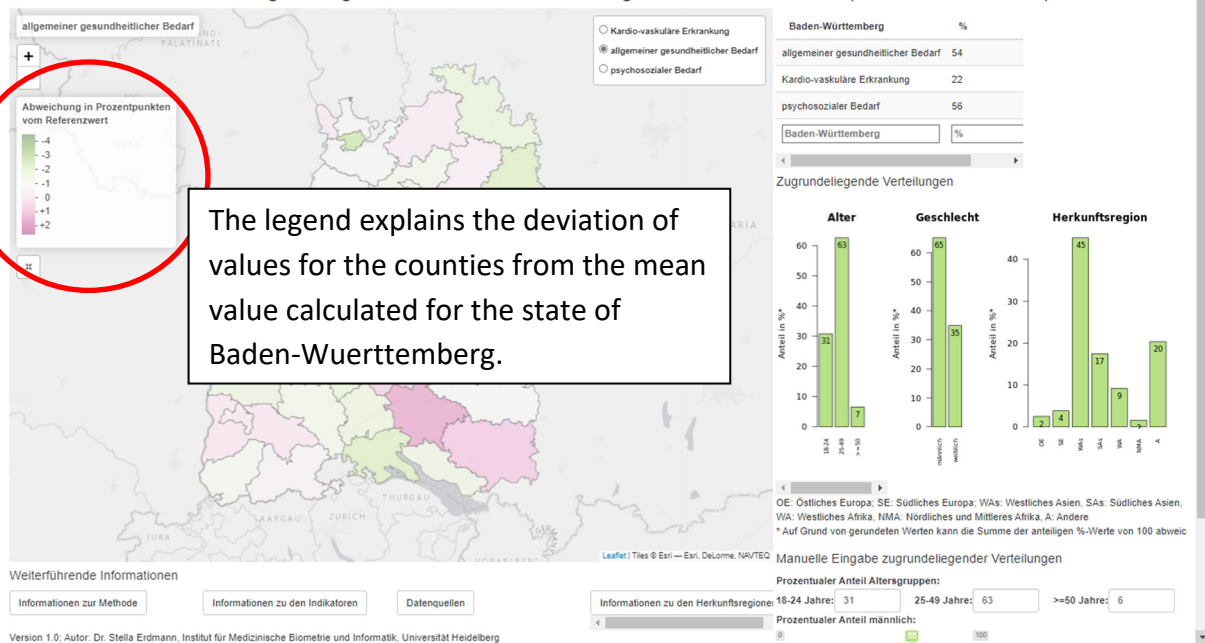

## Instrument zur Einschätzung der regionalen Krankheitslast unter geflüchteten Menschen (RESPOND-INTENT)

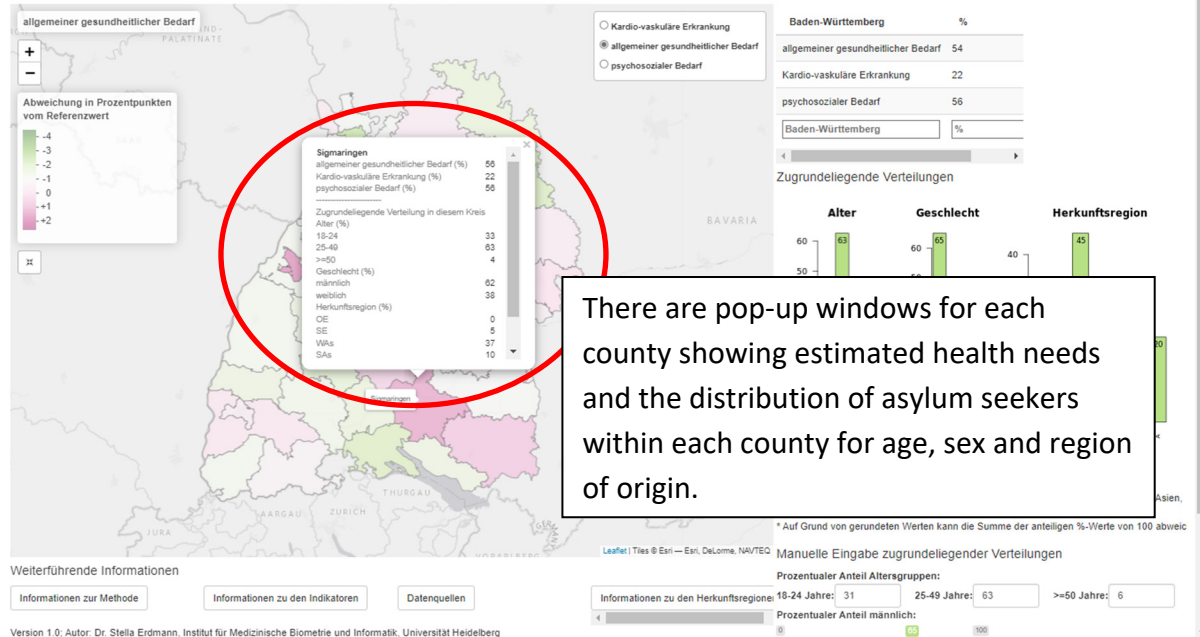

There are pop-up windows for each county showing estimated health needs and the distribution of asylum seekers within each county for age, sex and region of origin.

These buttons contain information on methods, health indicators, databases and region of origin. Pressing a button displays corresponding pop-up windows.

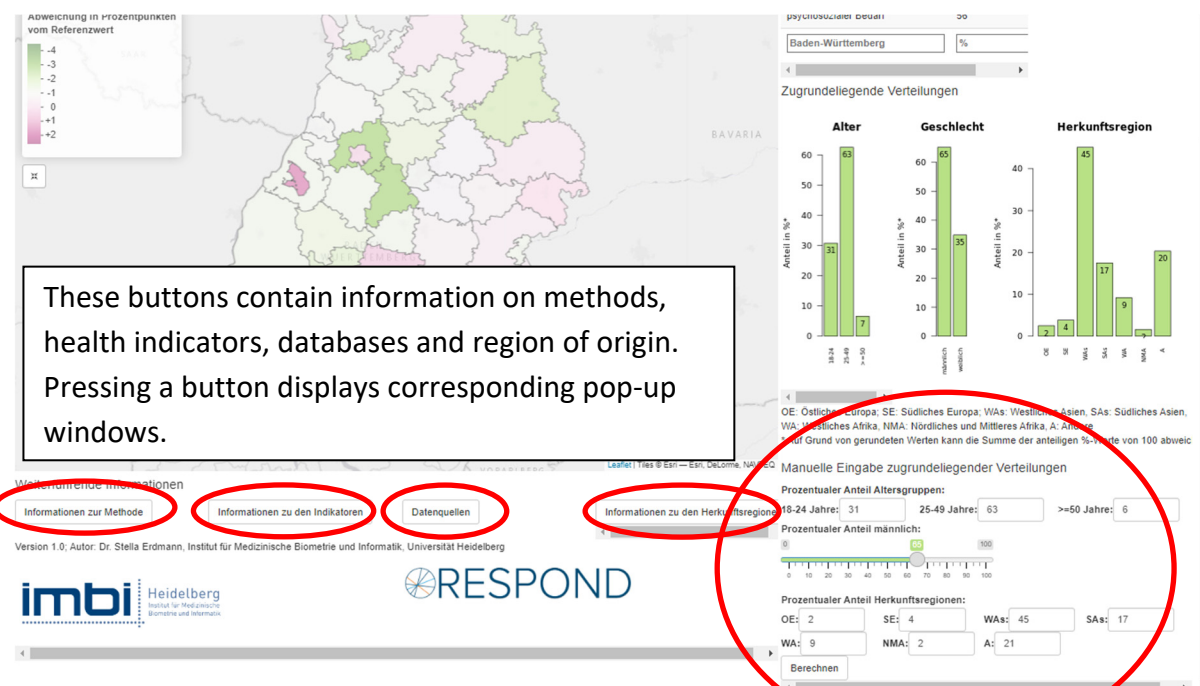

This is a field for manual entry. Since the underlying distributions are from 2018, they may have changed. Therefore, we offer this manual entry feature to enter the current distributions for age, sex, and region of origin. The values are then calculated accordingly and displayed at the top of the page.
